# Supplementary material for: Water soluble sulphur quantum dots for selective Ag+ sensing based on the ion aggregation-induced photoluminescence enhancement
Source: Royal Society of Chemistry journal article supplement (doi:10.1039/c5ay02451j), 2015-12-08
Supplement: c5ay02451j1.pdf [file c5ay02451j1.pdf]

# Supporting Information

## **Water Soluble Sulphur Quantum Dots for Selective Ag<sup>+</sup> Sensing Based on the Ion Aggregation-Induced Photoluminescence Enhancement**

Dejian Chen,<sup>a</sup> Shunxing Li,<sup>\*a,b</sup> Fengying Zheng<sup>a,b</sup>

<sup>a</sup> Department of Chemistry and Environment, Minnan Normal University, Zhangzhou,  
Fujian (P. R. China)

<sup>b</sup> Fujian Province Key Laboratory of Modern Analytical Science and Separation  
Technology Minnan Normal University, Zhangzhou, Fujian (P. R. China)

E-mail: lishunxing@mnnu.edu.cn; shunxing\_li@aliyun.com

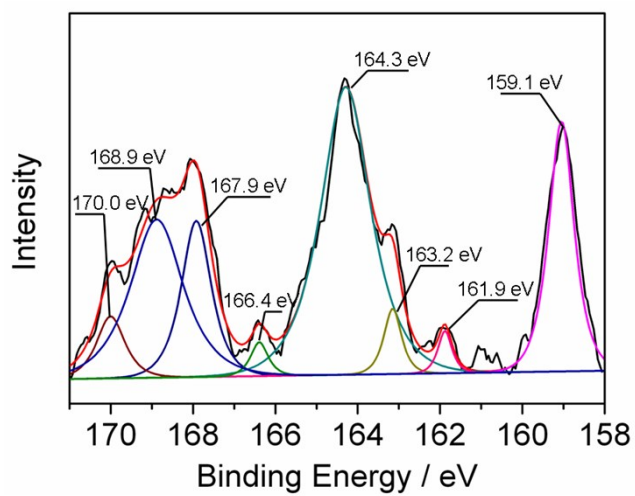

**Figure S1.** The X-ray photoelectron spectroscopy of SQDs. (Ref. *Adv. Funct. Mater.* 2014, 24, 7133-7138)

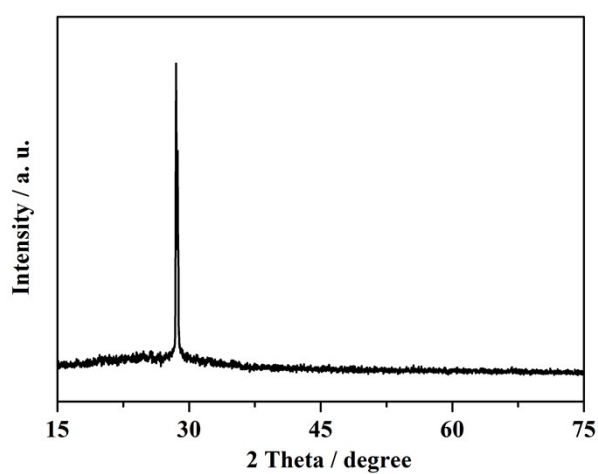

**Figure S2.** XRD spectrum of the SQDs.

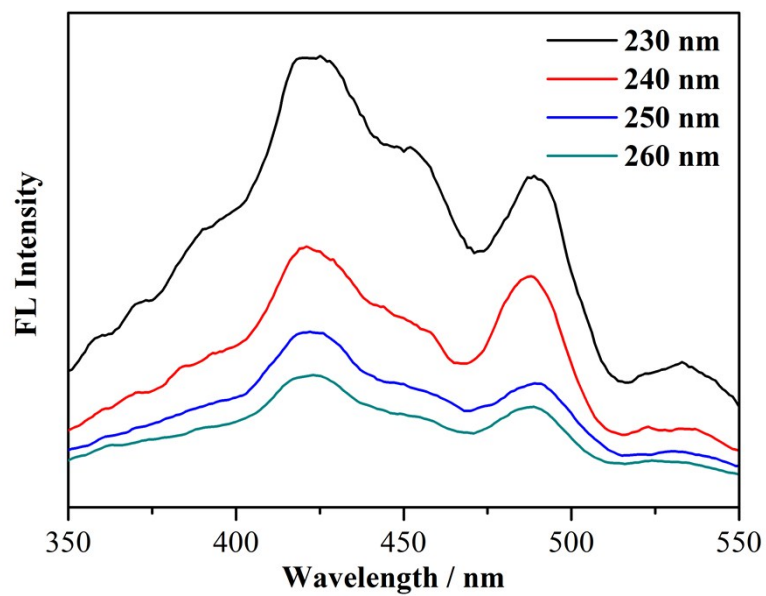

**Figure S3.** FL spectrum of the SQDs at different excitation wavelengths from 230 to 260 nm.

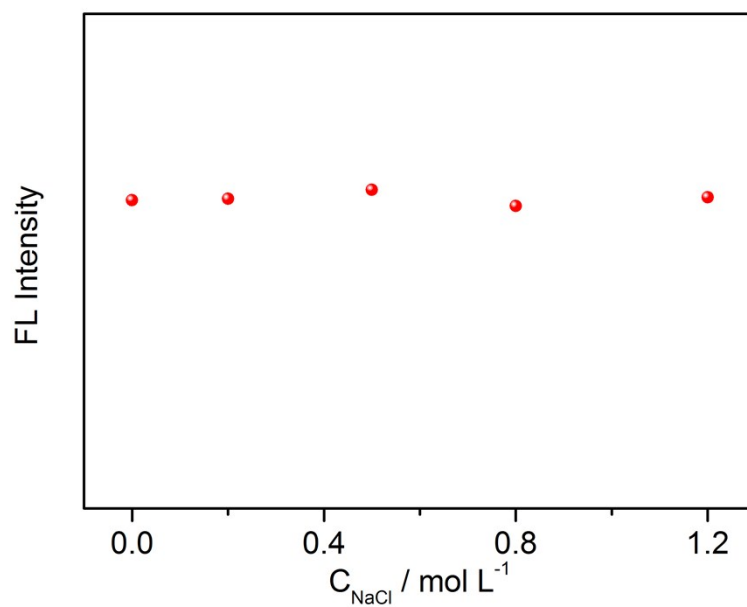

**Figure S4.** The FL intensity at 425 nm (excitation at 260 nm) of the SQDs in the NaCl solution.

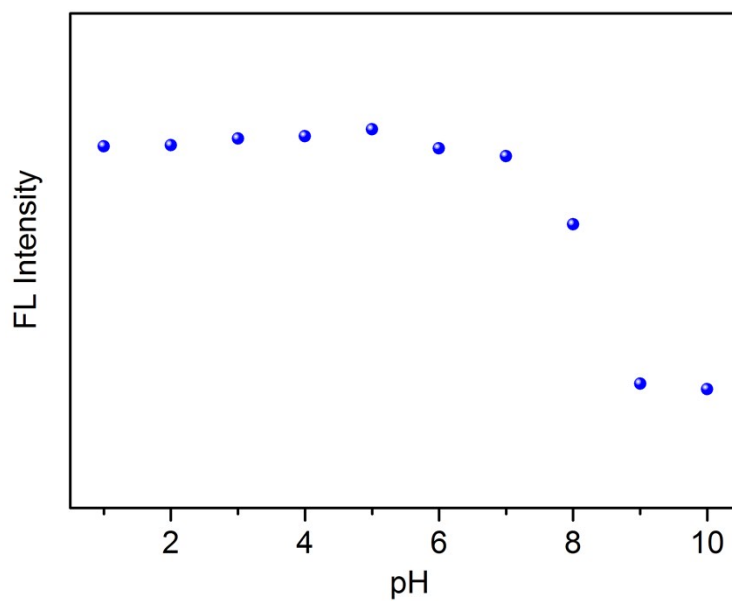

**Figure S5.** Dependence of the FL intensity on the pH values from 1 to 10.

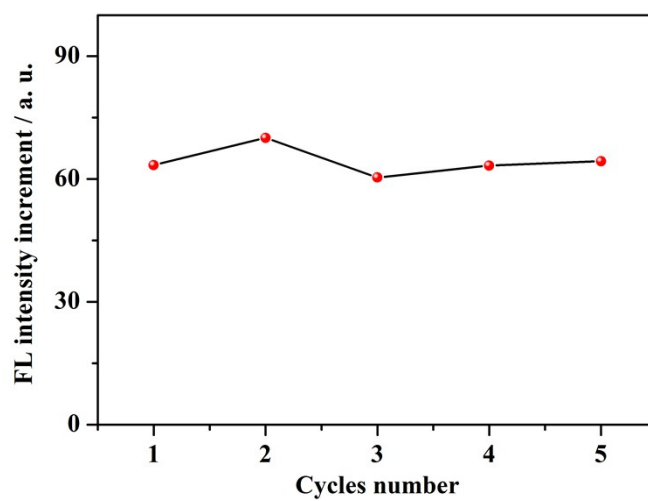

**Figure S6.** Cycles test  $\text{Ag}^+$  by adding five times known concentration  $\text{AgNO}_3$  (1  $\mu\text{L}$  1000 ppm).

**Table S1:** Comparison of the linear range and detect limit for silver ions using

different fluorescent probes.

| Probes                             | Linear range          | Detect limit       | Reference |
|------------------------------------|-----------------------|--------------------|-----------|
| Rhodamine B derivative             | 0.1-5.0 $\mu\text{M}$ | 0.13 $\mu\text{M}$ | 1         |
| Gold nanoclusters                  | 25 nM-3 $\mu\text{M}$ | 9 nM               | 2         |
| Au nanodots                        | 3-300 nM              | 1.5 nM             | 3         |
| Graphene quantum dots              | 0-100 nM              | 3.5 nM             | 4         |
| Polymer Carbon Nanoribbons         | 5 nM-80 $\mu\text{M}$ | 1.73 nM            | 5         |
| Fluorescein spirolactam derivative | 0.1-10 $\mu\text{M}$  | 0.08 $\mu\text{M}$ | 6         |
| Sulphur quantum dots               | 0-280 $\mu\text{M}$   | 0.81 $\mu\text{M}$ | This work |

**Table S2:** Analytical results for the determination of silver ions in well water and tap water samples using SQDs.

| Samples      | Added ( $\mu\text{M}$ ) | Found ( $\mu\text{M}$ ) | Recovery (%) | RSD (n=3, %) |
|--------------|-------------------------|-------------------------|--------------|--------------|
| Well water 1 | 50                      | 50.14                   | 104.69       | 4.44         |
| Well water 2 | 100                     | 98.45                   | 98.47        | 3.06         |
| Well water 3 | 200                     | 189.87                  | 95.49        | 5.05         |
| Tap water 1  | 50                      | 48.56                   | 106.36       | 5.19         |
| Tap water 2  | 100                     | 95.15                   | 96.74        | 4.51         |
| Tap water 3  | 200                     | 178.21                  | 97.71        | 7.96         |

## References:

- 1 Chatterjee A.; Santra M.; Won N.; Kim S.; Kim J. K.; Kim S. B.; Ahn K. H. *J. Am. Chem. Soc.*, **2009**, *131*, 2040-2041.
- 2 Sun J.; Yue Y.; Wang P.; He H. L.; Jin Y. D. *J. Mater. Chem. C*, **2013**, *1*, 908-913.
- 3 Chen P. C.; Yeh T. Y.; Ou C. M.; Shih C. C.; Chang H. T. *Nanoscale*, **2013**, *5*, 4691-4695.
- 4 Ran X.; Sun H. J.; Pu F.; Ren J. S.; Qu X. G. *Chem. Commun.*, **2013**, *49*, 1079-1081.
- 5 Wang Z. X.; Ding S. N. *Anal. Chem.*, **2014**, *86*, 7436-7445
- 6 Lin D. S.; Lai J. P.; Sun H.; Yang Z.; Zuo Y. *Anal. Methods*, **2014**, *6*, 1517-1522.
